# Supplementary material for: Few-layered tungsten selenide as a co-catalyst for visible-light-driven photocatalytic production of hydrogen peroxide for bacterial inactivation
Source: Royal Society of Chemistry journal article supplement (doi:10.1039/d0en00801j), 2020-01-01
Supplement: d0en00801j1.pdf [file d0en00801j1.pdf]

## **Supporting Information**

# **Few-layered Tungsten Selenide as Cocatalyst for Visible-light-driven Photocatalytic Production of Hydrogen Peroxide for Bacterial Inactivation**

Wanjun Wang, Wenquan Gu, Guiying Li, Haojing Xie, Po Keung Wong, Taicheng An\*

*Guangdong Key Laboratory of Environmental Catalysis and Health Risk Control, Guangzhou Key Laboratory Environmental Catalysis and Pollution Control, School of Environmental Science and Engineering, Institute of Environmental Health and Pollution Control, Guangdong University of Technology, Guangzhou 510006, China.*

### **Corresponding author**

---

Tel: +86 20 3932 2298, Fax: +86 20 3932 2298, E-mail: [antc99@gdut.edu.cn](mailto:antc99@gdut.edu.cn) (T.C. An);

Pages: 14

Contents: Environmental details;

Nine Figures (Figure S1-S9)

One Table (Table S1)

## 1. Fabrication of WSe<sub>2</sub> nanosheets

WSe<sub>2</sub> nanosheets was prepared by one-step solvothermal method.<sup>1, 2</sup> Briefly, 200 mg of NaBH<sub>4</sub>, 640 mg of Se powder, and 1.32 g of Na<sub>2</sub>WO<sub>4</sub>·2H<sub>2</sub>O were weighed and dissolved in 60 mL Dimethyl Formamide (DMF) solution. Then, the obtained mixtures were vigorously stirred for 3 h. Subsequently, the mixtures were transferred into a 100 mL autoclave, which was maintained at 240 °C in an electric furnace for 24 h. After cooling naturally, the product was collected by centrifuged. Subsequently, washed several times with DI water and absolute ethanol, and dried at 60 °C under vacuum for 24 h. The composite was annealed at 300 °C for 5 h under Ar atmosphere to obtain the final product.

## 2. Characterization of materials

Crystallographic structures of the as-prepared materials were recorded X-ray diffractometer (XRD) (Cu K $\alpha$ , D/max-Ultima IV). The structure of composite photocatalyst was characterized by a Fourier transform infrared spectrometer (FT-IR, Nicolet is10). UV–vis absorption spectra was obtained by an UV–vis Cary 100 spectrophotometer equipped with a labsphere diffuse reflectance accessory (Agilent, USA). Morphologies and microstructures of the products were examined by scanning electron microscopy (SEM) (SU8220, Hitach, Japan) and transmission electron microscopy (TEM) (FE-HRTEM, Talos F200s, FEI Company). High-angle annular dark field (HAADF) and energy dispersive X-ray spectroscopy (EDS) were completed on transmission electron microscopy (TEM) too. The X-ray photoelectron spectroscopy (XPS) was used to analysis surface electronic states (Escalab 250Xi, Thermo Fisher Scientific). All binding energies were calibrated using contaminant carbon (C1s = 284.8

eV). Photoluminescence spectra (PL) and time-resolved PL spectra of the samples were obtained at room temperature excited by incident light of 365 nm using a fluorescence spectrometer (Edinburgh FLS1000). The time-resolved fluorescence decay was fitted by the following equation (1):

$$I(t) = A_1 \exp(-t/\tau_1) + A_2 \exp(-t/\tau_2) \quad (1)$$

where  $\tau_1$  and  $\tau_2$  represent the fluorescence lifetime,  $A_1$  and  $A_2$  represent the relative amplitudes. The fluorescence lifetime  $\tau_1$  (short lifetime) was assigned to the non-radiative recombination of the photo-induced electrons with the surface defects; the fluorescence lifetime  $\tau_2$  (long lifetime) was derived from the bandgap charge-carriers recombination. The average fluorescence lifetimes ( $\tau_{\text{Avg}}$ ) were calculated according to the equation (2):<sup>3</sup>

$$\tau_{\text{Avg}} = \frac{A_1 \tau_1^2 + A_2 \tau_2^2}{A_1 \tau_1 + A_2 \tau_2} \quad (2)$$

### 3. Photoelectrochemical measurements

Electrochemical impedance spectroscopy (EIS) and photocurrent tests were conducted on an electrochemical workstation (CHI 650E, Shanghai Chenhua Instruments, China) with a standard three-electrode cell, using a Pt plate and a saturated Ag/AgCl electrode as counter electrode and reference electrode, respectively. The working electrodes were prepared on the fluorine doped tin oxide (FTO) glass. The electrolyte used was 0.1 M Na<sub>2</sub>SO<sub>4</sub> aqueous solution. 7 mg catalysis was mixed with 0.25 mL ethanol and 10  $\mu$ L nafion solution by ultrasonicing for 30 min. The mixture was loaded on FTO glass and dry at 60 °C under atmospheric air. A 300 W Xe lamp with a 420 nm cut-off filter acted as the light source in the tests. Photocurrent measurements were recorded with a bias potential of 0.1 V. The EIS examinations were

conducted across the frequency range of  $10^{-2}$  Hz -  $10^5$  Hz on applied voltage of 0 V with an AC perturbation signal of 5 mV. The Mott-Schottky measurement was performed at frequency of 500 Hz and 1000 Hz.

Rotating disc electrode (RDE, Pine Co. Ltd) tests were employing to investigate the number of electron transfer for  $O_2$  reduction. 2 mg of catalysts were dispersed in 1 mL of 1% nafion. After ultrasonication for 30 min, 10  $\mu$ L of homogenous ink was adhered onto glassy carbon electrodes (GCE) as the working electrode. The Linear sweep voltammetry (LSV, 50mV/s scan rate) on catalysts coated RDE were measured in a  $O_2$ -saturated 0.1 M KOH electrolyte at rotating rates from 100 to 1800 rpm. The numbers of electron transfer ( $n$ ) were evaluated by Koutecky-Levich equation (3).

$$\frac{1}{i} = \frac{1}{i_k} + \left[ \frac{1}{0.620nFAD^{2/3}\nu^{-1/6}C} \right] \omega^{-1/2} \quad (3)$$

Wherein,  $i$  is the measured current density,  $F$  is the Faraday constant (96485 C/mol),  $A$  is the electrode area (0.196 cm<sup>2</sup>),  $D$  is the diffusion coefficient of the oxygen ( $1.93 \times 10^{-5}$  cm<sup>2</sup> s<sup>-1</sup>),  $\nu$  is the kinematic viscosity of the solution (0.0109 cm<sup>2</sup> s<sup>-1</sup>),  $C$  is the bulk concentration of oxygen ( $1.26 \times 10^{-3}$  M),  $n$  is overall number of transferred number,  $\omega$  is the angular rotation rate.

#### 4. H<sub>2</sub>O<sub>2</sub> measurements

To make a stock solution, 0.1 g of N,N-diethyl-1,4-phenylene-diamine sulfate (DPD, 97%, Aldrich) was dissolved in 10 mL of 0.1 N H<sub>2</sub>SO<sub>4</sub> solution and 0.01 g of peroxidase (POD, horseradish, Aldrich) was dissolved in 10 mL of purified water. Buffer solution was prepared by mixing of 87.7 mL of 1 M monobasic sodium phosphate (Aldrich) solution, 12.6 mL of 1 M dibasic sodium phosphate heptahydrate (Aldrich) solution, and 99.7 mL of purified water. For

measurement, 0.4 mL of phosphate buffer, 1.12 mL of water, 1 mL of sample aliquots, 0.05 mL of DPD, and 0.05 mL of POD were mixed and kept under vigorous stirring for 90 seconds. The concentration of  $\text{H}_2\text{O}_2$  was obtained by analyzing the absorbance at 551 nm using a Microplate Reader (Varioskan Lux, Thermo Scientific). <sup>4</sup>

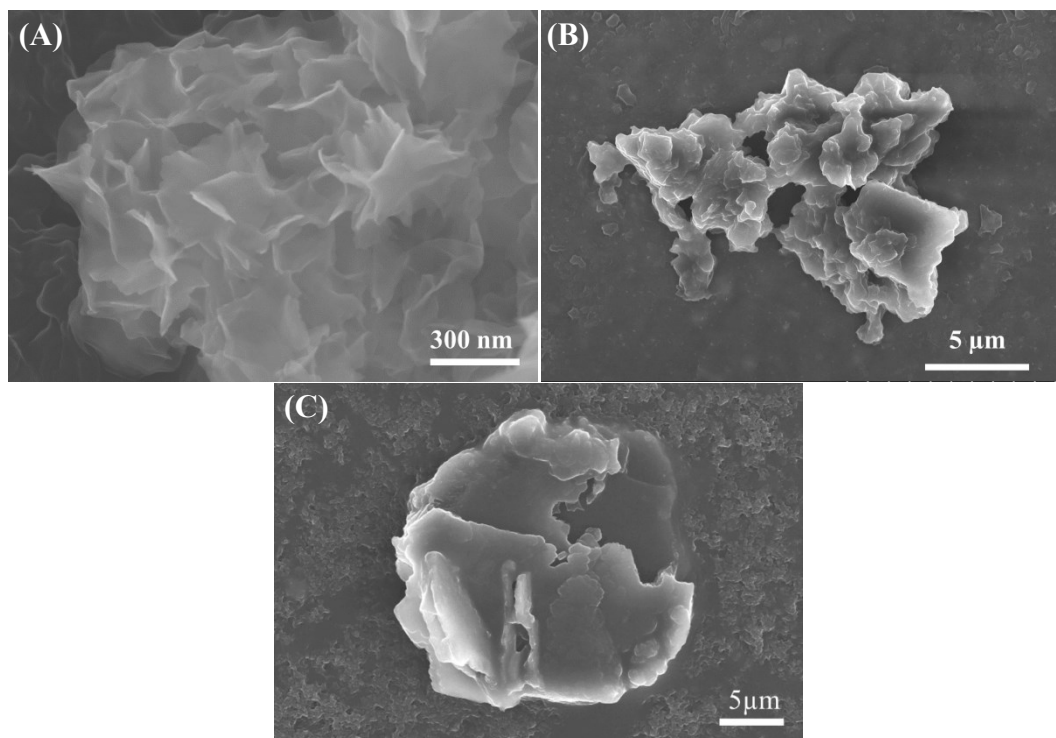

**Figure S1.** Typical scanning electron microscopy (SEM) images of (A) WSe<sub>2</sub> nanosheets; (B) pristine g-C<sub>3</sub>N<sub>4</sub>; and (C) bare g-C<sub>3</sub>N<sub>4</sub> (BCN) synthesized by treating pristine g-C<sub>3</sub>N<sub>4</sub> with NaBH<sub>4</sub>.

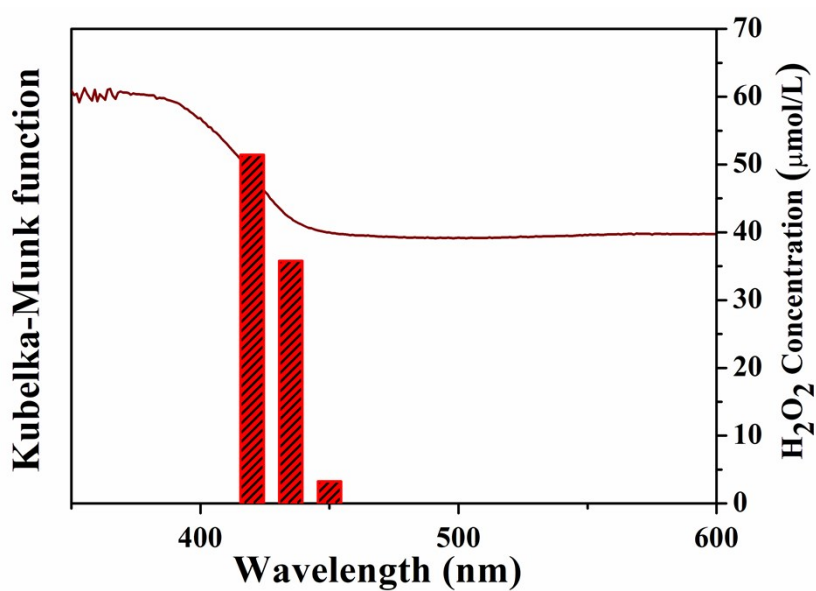

**Figure S2.** Wavelength dependent photocatalytic H<sub>2</sub>O<sub>2</sub> evolution over WSe<sub>2</sub>/g-C<sub>3</sub>N<sub>4</sub> (CNW-4) under different monochromatic light irradiation.

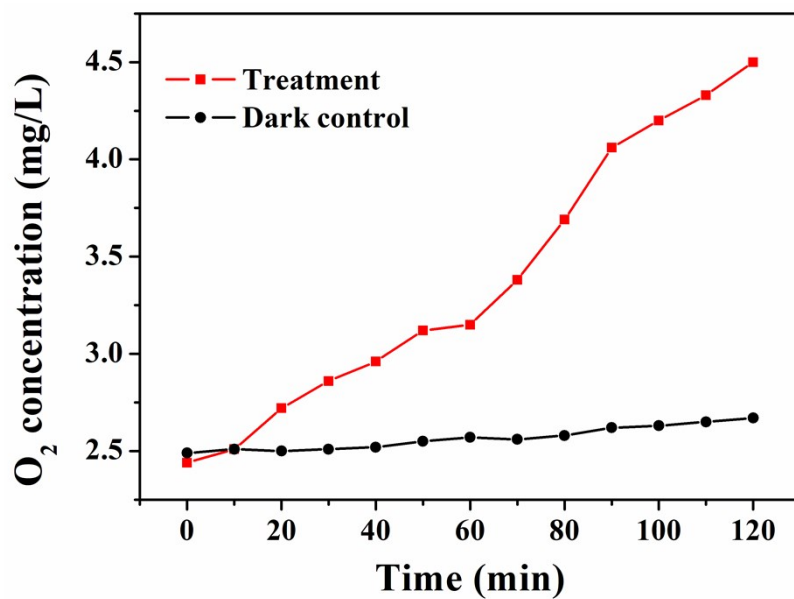

**Figure S3.** Time-dependent evolution of dissolved O<sub>2</sub> in the WSe<sub>2</sub>/g-C<sub>3</sub>N<sub>4</sub> (CNW-4) system under VL irradiation in a sealed reactor (pre-deoxygenated by N<sub>2</sub> bubbling for 0.5 h).

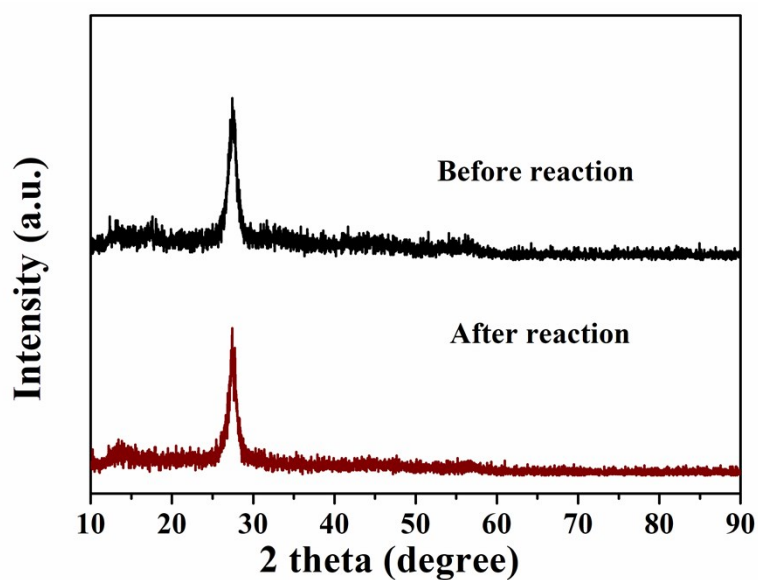

**Figure S4.** XRD pattern of CNW-4 before and after three successive repeated photocatalytic H<sub>2</sub>O<sub>2</sub> production experiments

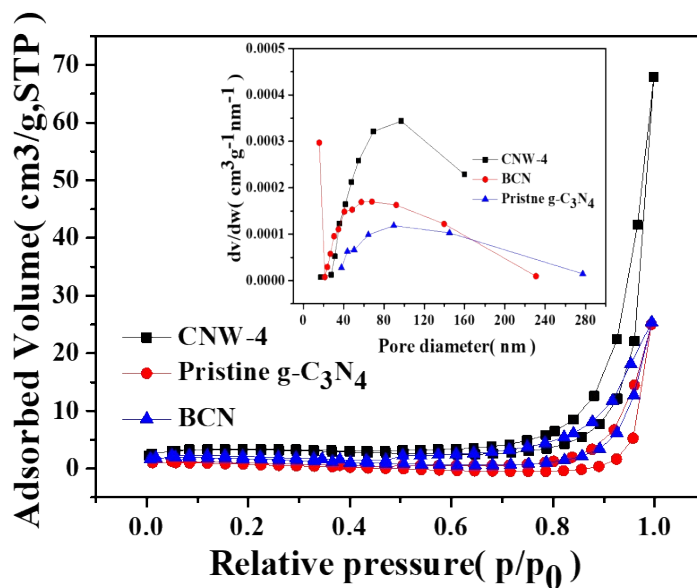

**Figure S5.** Nitrogen adsorption-desorption isotherms and the Barret-Joyner-Halenda (BJH) pore size distribution plot (inset) of the as-prepared pristine g-C<sub>3</sub>N<sub>4</sub>, bare g-C<sub>3</sub>N<sub>4</sub> (BCN) and WSe<sub>2</sub>/g-C<sub>3</sub>N<sub>4</sub> (CNW-4).

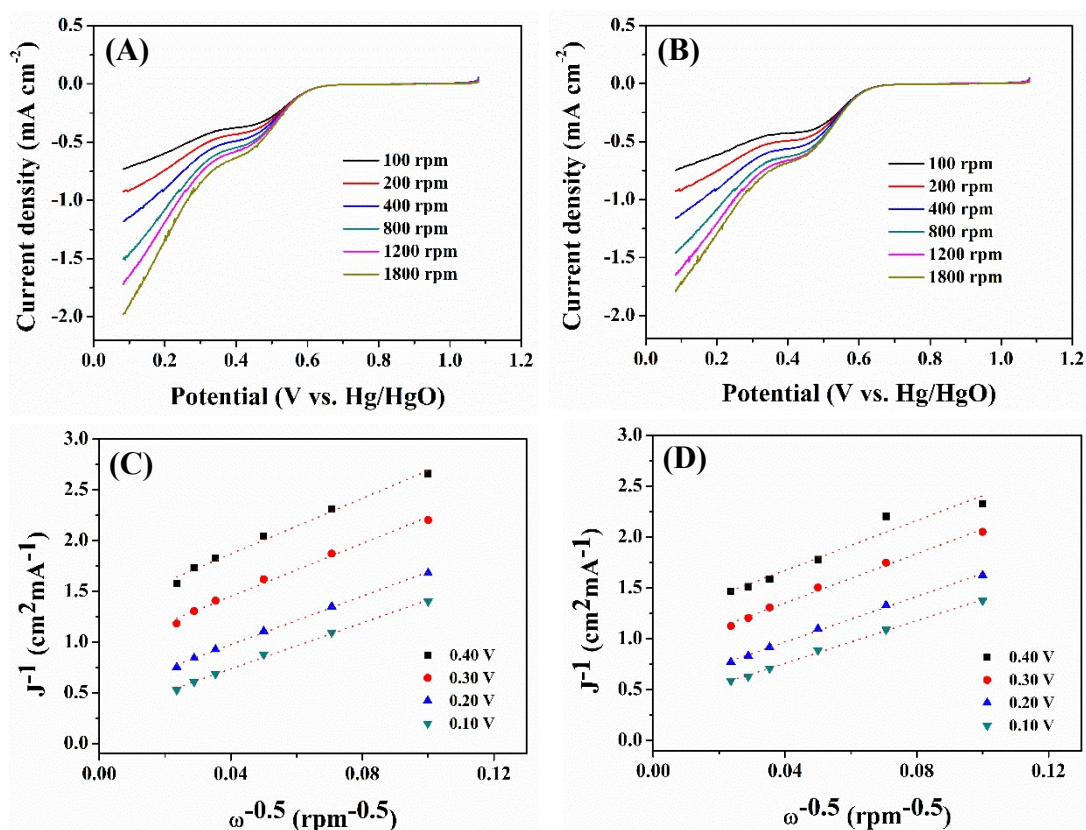

**Figure S6.** Linear sweep voltammetry (LSV) of (a) g-C<sub>3</sub>N<sub>4</sub> and (b) CNW-4 at different rotation rates; Koutecky-Levich plots at different potentials for (a) g-C<sub>3</sub>N<sub>4</sub> and (b) CNW-4.

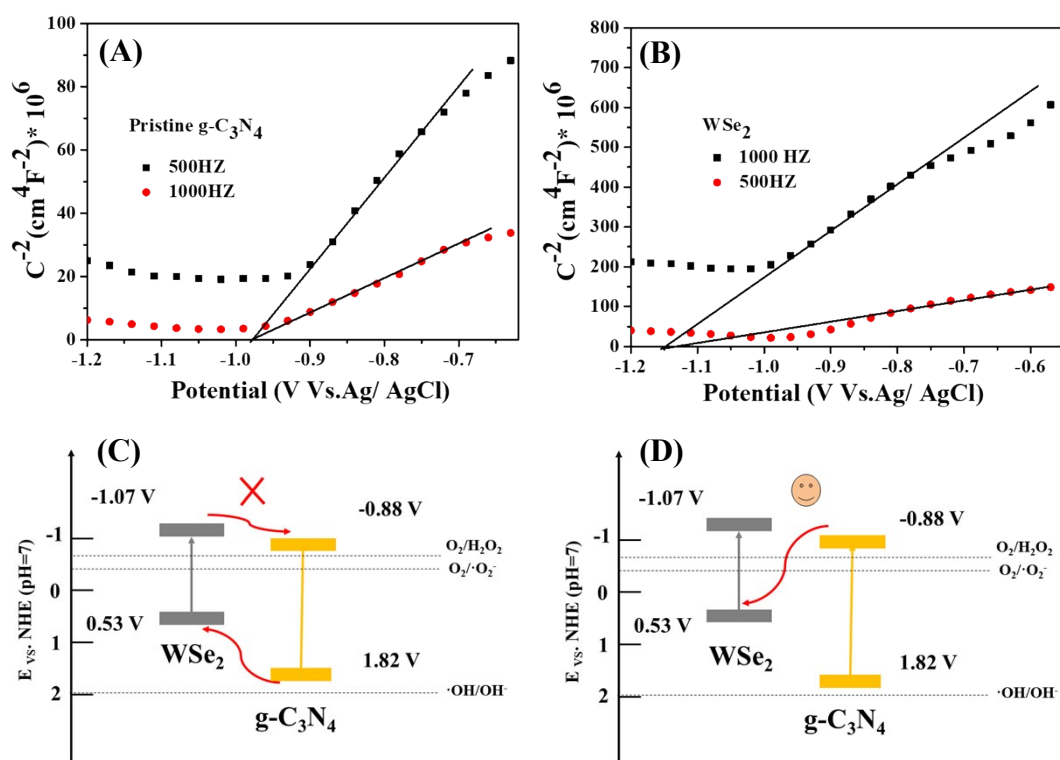

**Figure S7.** Mott–Schottky plots for (A) pristine  $\text{g-C}_3\text{N}_4$  and (B)  $\text{WSe}_2$  nanosheets with the frequency settled at 0.5 or 1.0 kHz; Schematic illustration of (C) Type II heterojunction charge transfer pathway and (D) Z-scheme pathway;

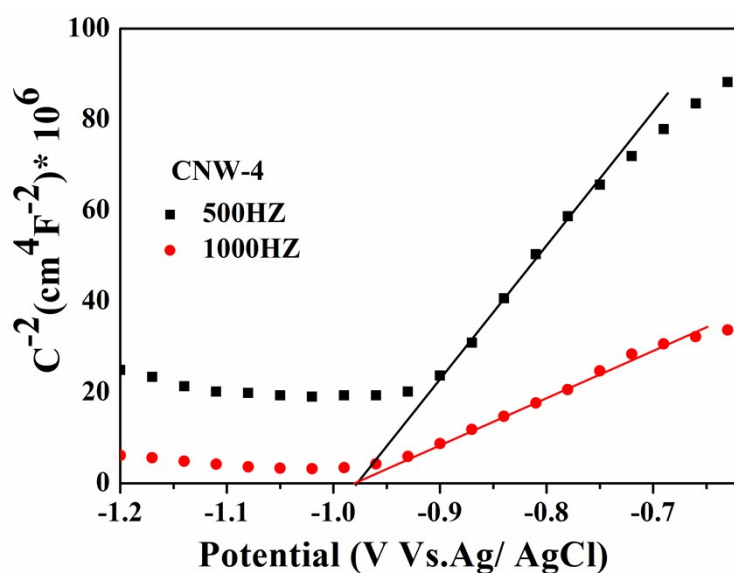

**Figure S8.** Mott–Schottky plots for  $\text{WSe}_2/\text{g-C}_3\text{N}_4$  (CNW-4) composite showing similar flat-band potential ( $V_{\text{fb}}$ ) as  $\text{g-C}_3\text{N}_4$ .

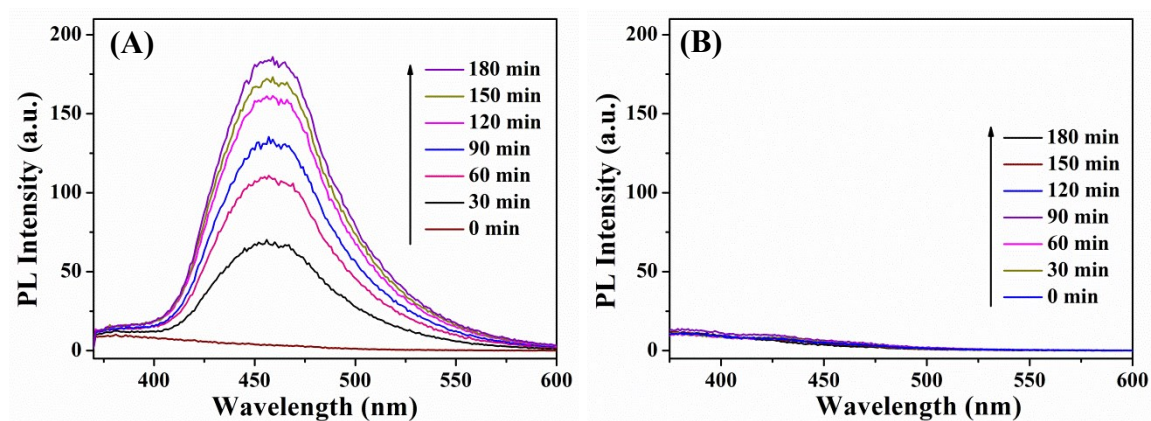

**Figure S9.** (A) Fluorescence spectra of coumarin solution (1 mM) in WSe<sub>2</sub>/g-C<sub>3</sub>N<sub>4</sub> (CNW-4) with Fe(II), and (B) without Fe (II) under VL irradiation.

**Table S1. Comparison of photocatalytic production of H<sub>2</sub>O<sub>2</sub> evolution in various representative works**

| Photocatalyst                                                   | Photocatalyst concentration | Sacrificial agent | Light source | H <sub>2</sub> O <sub>2</sub> amount (μmol/L/h) | Enhanced times compared with pristine g-C <sub>3</sub> N <sub>4</sub> | Reference |
|-----------------------------------------------------------------|-----------------------------|-------------------|--------------|-------------------------------------------------|-----------------------------------------------------------------------|-----------|
| Ti <sub>3</sub> C <sub>2</sub> /g-C <sub>3</sub> N <sub>4</sub> | 1000 mg/L                   | 10 % isopropanol  | λ > 420 nm   | 132                                             | 2.1 times                                                             | 5         |
| <sup>a</sup> PT-g-C <sub>3</sub> N <sub>4</sub>                 | 500 mg/L                    | 10 % ethanol      | λ > 400 nm   | 27.07                                           | N.A.                                                                  | 6         |
| <sup>b</sup> POM/g-C <sub>3</sub> N <sub>4</sub>                | 1000 mg/L                   | 5 % methanol      | AM 1.5       | 17.8                                            | 2.04 times                                                            | 7         |
| CNTs/g-C <sub>3</sub> N <sub>4</sub>                            | 1000 mg/L                   | 5% formic acid    | λ > 400 nm   | 48.7                                            | 3.20 times                                                            | 8         |
| <sup>c</sup> BNQD/g-C <sub>3</sub> N <sub>4</sub>               | 1000 mg/L                   | 10% IPA           | λ > 420 nm   | 72.30                                           | 3.18 times                                                            | 9         |
| <sup>d</sup> BP /g-C <sub>3</sub> N <sub>4</sub>                | 1667 mg/L                   | 10% IPA           | λ > 420 nm   | 27                                              | 1.5 times                                                             | 10        |
| <sup>a</sup> PT-g-C <sub>3</sub> N <sub>4</sub>                 | 500 mg/L                    | Pure water        | λ > 400 nm   | 14.46                                           | 13 times                                                              | 6         |
| Inverse opal g-C <sub>3</sub> N <sub>4</sub>                    | 1000 mg/L                   | Pure water        | λ > 420 nm   | 23.12                                           | 2.36 times                                                            | 11        |
| CNTs/g-C <sub>3</sub> N <sub>4</sub>                            | 1000 mg/L                   | Pure water        | λ > 400 nm   | 13                                              | 5.2 times                                                             | 8         |
| <sup>c</sup> PI/g-C <sub>3</sub> N <sub>4</sub>                 | 1000 mg/L                   | Pure water        | λ > 420 nm   | 60                                              | 4.6 times                                                             | 12        |
| <sup>b</sup> POM/g-C <sub>3</sub> N <sub>4</sub>                | 1000 mg/L                   | Pure water        | λ > 320 nm   | 35                                              | 2.69 times                                                            | 13        |

|                                                         |           |            |                    |     |            |               |
|---------------------------------------------------------|-----------|------------|--------------------|-----|------------|---------------|
| g-C <sub>3</sub> N <sub>4</sub> aerogels                | 1667 mg/L | Pure water | $\lambda > 420$ nm | 48  | 3.86 times | <sup>14</sup> |
| WSe <sub>2</sub> /g-C <sub>3</sub> N <sub>4</sub> (CNW- | 1000 mg/L | Pure water | $\lambda > 420$ nm | 41  | 11.8 times | This work     |
| 4)                                                      | 1000 mg/L | Ethanol    | $\lambda > 420$ nm | 120 | 35.0 times | This work     |

---

<sup>a</sup> Plasma-treated g-C<sub>3</sub>N<sub>4</sub>; <sup>b</sup> Polyoxometalates/g-C<sub>3</sub>N<sub>4</sub>; <sup>c</sup> Boron nitride quantum dots decorated g-C<sub>3</sub>N<sub>4</sub>; <sup>d</sup> Black phosphorus/g-C<sub>3</sub>N<sub>4</sub>; <sup>e</sup> perylene imides modified g-C<sub>3</sub>N<sub>4</sub>

## References

1. B. Yu, B. J. Zheng, X. Q. Wang, F. Qi, J. R. He, W. L. Zhang and Y. F. Chen, Enhanced photocatalytic properties of graphene modified few-layered WSe<sub>2</sub> nanosheets, *Appl. Surf. Sci.*, 2017, **400**, 420-425.
2. X. Wang, J. He, B. Zheng, W. Zhang and Y. Chen, Few-layered WSe<sub>2</sub> in-situ grown on graphene nanosheets as efficient anode for lithium-ion batteries, *Electrochim. Acta*, 2018, **283**, 1660-1667.
3. S. L. Huang, H. Yi, L. H. Zhang, Z. Y. Jin, Y. J. Long, Y. Y. Zhang, Q. F. Liao, J. Na, H. Z. Cui, S. C. Ruan, Y. Yamauchi, T. Wakihara, Y. V. Kaneti and Y. J. Zeng, Non-precious molybdenum nanospheres as a novel cocatalyst for full-spectrum-driven photocatalytic CO<sub>2</sub> reforming to CH<sub>4</sub>, *J. Hazard. Mater.*, 2020, **393**, 122324.
4. G.-H. Moon, D.-H. Kim, H.-I. Kim, A. D. Bokare and W. Choi, Platinum-like behavior of reduced graphene oxide as a cocatalyst on TiO<sub>2</sub> for the efficient photocatalytic oxidation of arsenite, *Environ. Sci. Technol. Lett.*, 2014, **1**, 185-190.
5. Y. Yang, Z. T. Zeng, G. M. Zeng, D. L. Huang, R. Xiao, C. Zhang, C. Y. Zhou, W. P. Xiong, W. J. Wang, M. Cheng, W. J. Xue, H. Guo, X. Tang and D. H. He, Ti<sub>3</sub>C<sub>2</sub> Mxene/porous g-C<sub>3</sub>N<sub>4</sub> interfacial Schottky junction for boosting spatial charge separation in photocatalytic H<sub>2</sub>O<sub>2</sub> production, *Appl. Catal. B: Environ.*, 2019, **258**, 117956.
6. N. Lu, N. Liu, Y. Hui, K. Shang, N. Jiang, J. Li and Y. Wu, Characterization of highly effective plasma-treated g-C<sub>3</sub>N<sub>4</sub> and application to the photocatalytic H<sub>2</sub>O<sub>2</sub> production, *Chemosphere*, 2019, **241**, 124927.
7. S. Zhao, X. Zhao, S. X. Ouyang and Y. F. Zhu, Polyoxometalates covalently combined with graphitic carbon nitride for photocatalytic hydrogen peroxide production, *Catal. Sci. Technol.*, 2018, **8**, 1686-1695.
8. S. Zhao, T. Guo, X. Li, T. G. Xu, B. Yang and X. Zhao, Carbon nanotubes covalent combined with graphitic carbon nitride for photocatalytic hydrogen peroxide production under visible light, *Appl. Catal. B: Environ.*, 2018, **224**, 725-732.
9. Y. Yang, C. Zhang, D. L. Huang, G. M. Zeng, J. H. Huang, C. Lai, C. Y. Zhou, W. J. Wang, H. Guo, W. J. Xue, R. Deng, M. Cheng and W. P. Xiong, Boron nitride quantum dots decorated ultrathin porous g-C<sub>3</sub>N<sub>4</sub>: Intensified exciton dissociation and charge transfer for promoting visible-light-driven molecular oxygen activation, *Appl. Catal. B: Environ.*, 2019, **245**, 87-99.

10. Y. Zheng, Z. H. Yu, H. H. Ou, A. M. Asiri, Y. L. Chen and X. C. Wang, Black phosphorus and polymeric carbon nitride heterostructure for photoinduced molecular oxygen activation, *Adv. Funct. Mater.*, 2018, **28**, 1705407.
11. J. Y. Lei, B. Chen, W. J. Lv, L. Zhou, L. Z. Wang, Y. D. Liu and J. L. Zhang, Robust photocatalytic H<sub>2</sub>O<sub>2</sub> production over inverse opal g-C<sub>3</sub>N<sub>4</sub> with carbon vacancy under visible Light, *ACS Sustain. Chem. Eng.*, 2019, **7**, 16467-16473.
12. L. P. Yang, G. H. Dong, D. L. Jacobs, Y. H. Wang, L. Zang and C. Y. Wang, Two-channel photocatalytic production of H<sub>2</sub>O<sub>2</sub> over g-C<sub>3</sub>N<sub>4</sub> nanosheets modified with perylene imides, *J. Catal.*, 2017, **352**, 274-281.
13. S. Zhao, X. Zhao, H. Zhang, J. Li and Y. Zhu, Covalent combination of polyoxometalate and graphitic carbon nitride for light-driven hydrogen peroxide production, *Nano Energy*, 2017, **35**, 405-414.
14. H. H. Ou, P. J. Yang, L. H. Lin, M. Anpo and X. C. Wang, Carbon Nitride Aerogels for the Photoredox Conversion of Water, *Angew. Chem. Int. Edit.*, 2017, **56**, 10905-10910.
